# Supplementary material for: Revealing microbial recognition by specific antibodies
Source: PubMed Central journal article supplement (PMC4489363; doi:10.1186/s12866-015-0456-y), 2015-07-02
Supplement: 12866_2015_456_MOESM2_ESM.pdf [file 12866_2015_456_MOESM2_ESM.pdf]

**Supplementary Table 1.** Estimated number of Ig-coated cells as detected by Fluorescence-Activated Cell Sorting in saliva, oral biofilm, breast milk and fecal human samples.

(\*) indicates the number of events marked by the DNA-labelling fluorophore SYTO62; its number is larger than the addition of the following two columns, as it includes the events marked with anti-mouse Ig (potential non-specific binding). (1) Estimated Ig-coated cells calculated as a proportion out of the addition of opsonized and non-opsonized sorted events. (2) Upper estimate of opsonization, calculated as a proportion of total events, including potential non-specific binding (1-non-stained/total cells).

|                                     | Ig type | Total number of events (*) | Events not stained with anti-Ig marker | Events stained with anti-Ig marker | Estimated % opsonization (1) | Estimated % opsonization (2) |
|-------------------------------------|---------|----------------------------|----------------------------------------|------------------------------------|------------------------------|------------------------------|
| <i>Saliva Samples</i>               |         |                            |                                        |                                    |                              |                              |
| NCA.01                              | IgA     | 277519                     | 24000                                  | 24827                              | 50.85                        | 91.35                        |
| NCA.01                              | IgG     | 317523                     | 313                                    | 292643                             | 99.89                        | 99.90                        |
| NCA.03                              | IgA     | 2329                       | 907                                    | 902                                | 49.86                        | 61.06                        |
| NCA.03                              | IgG     | 3379                       | 1189                                   | 1501                               | 55.80                        | 64.81                        |
| NCA.13                              | IgA     | 64277                      | 331                                    | 21999                              | 98.52                        | 99.49                        |
| NCA.13                              | IgG     | 52681                      | 90                                     | 23514                              | 99.62                        | 99.83                        |
| NCA.12                              | IgA     | 52489                      | 794                                    | 9689                               | 92.43                        | 98.49                        |
| NCA.12                              | IgG     | 39581                      | 300                                    | 8024                               | 96.40                        | 99.24                        |
| NCA14                               | IgA     | 7818                       | 79                                     | 5939                               | 98.69                        | 98.99                        |
| NCA.14                              | IgG     | 5736                       | 19                                     | 5042                               | 99.62                        | 99.67                        |
| NCA.15                              | IgA     | 35682                      | 2826                                   | 7651                               | 73.03                        | 92.08                        |
| NCA.15                              | IgG     | 8144                       | 8                                      | 7012                               | 99.89                        | 99.90                        |
| NCA.16                              | IgA     | 46420                      | 391                                    | 34086                              | 98.87                        | 99.16                        |
| NCA.16                              | IgG     | 56675                      | 48                                     | 55120                              | 99.91                        | 99.92                        |
| CA.54                               | IgA     | 230726                     | 199300                                 | 1407                               | 0.70                         | 13.62                        |
| CA.54                               | IgG     | 121442                     | 19563                                  | 13018                              | 39.96                        | 83.89                        |
| CA.57                               | IgA     | 13154                      | 3523                                   | 351                                | 9.06                         | 73.22                        |
| CA.57                               | IgG     | 7648                       | 605                                    | 3649                               | 85.78                        | 92.09                        |
| CA.58                               | IgA     | 4201                       | 891                                    | 1686                               | 65.42                        | 78.79                        |
| CA.58                               | IgG     | 3812                       | 134                                    | 3011                               | 95.74                        | 96.48                        |
| CA.59                               | IgA     | 713765                     | 367303                                 | 12357                              | 3.25                         | 48.54                        |
| CA.59                               | IgG     | 29276                      | 966                                    | 24839                              | 96.26                        | 96.70                        |
| CA.60                               | IgA     | 1497908                    | 858524                                 | 26979                              | 3.05                         | 42.69                        |
| CA.21                               | IgA     | 16225                      | 1175                                   | 1938                               | 62.25                        | 92.76                        |
| CA.21                               | IgG     | 9756                       | 933                                    | 3235                               | 77.61                        | 90.44                        |
| <i>Oral Biofilm (dental plaque)</i> |         |                            |                                        |                                    |                              |                              |
| NCA.01                              | IgA     | 18184                      | 2372                                   | 3711                               | 61.01                        | 86.96                        |
| NCA.01                              | IgG     | 22496                      | 411                                    | 14326                              | 97.21                        | 98.17                        |
| NCA.03                              | IgA     | 92386                      | 17260                                  | 19580                              | 53.15                        | 81.32                        |
| NCA.03                              | IgG     | 21918                      | 1213                                   | 11427                              | 90.40                        | 94.47                        |
| NCA.13                              | IgA     | 6341                       | 720                                    | 1880                               | 72.31                        | 88.65                        |
| NCA.13                              | IgG     | 18137                      | 121                                    | 8910                               | 98.66                        | 99.33                        |
| NCA.12                              | IgA     | 68915                      | 2946                                   | 13444                              | 82.03                        | 95.73                        |
| NCA.12                              | IgG     | 54898                      | 390                                    | 22898                              | 98.33                        | 99.29                        |
| NCA14                               | IgA     | 651156                     | 7032                                   | 220752                             | 96.91                        | 98.92                        |

|                      |     |         |        |        |       |       |
|----------------------|-----|---------|--------|--------|-------|-------|
| NCA.14               | IgG | 617821  | 276    | 383777 | 99.93 | 99.96 |
| NCA.15               | IgA | 755467  | 1056   | 355902 | 99.70 | 99.86 |
| NCA.15               | IgG | 1061756 | 3168   | 445649 | 99.29 | 99.70 |
| NCA.16               | IgA | 250136  | 89     | 200327 | 99.96 | 99.96 |
| CA.54                | IgA | 21936   | 12466  | 284    | 2.23  | 43.17 |
| CA.54                | IgG | 17576   | 1605   | 4383   | 73.20 | 90.87 |
| CA.57                | IgA | 7412    | 4928   | 34     | 0.69  | 33.51 |
| CA.57                | IgG | 2885    | 854    | 126    | 12.86 | 70.40 |
| CA.58                | IgA | 2387    | 617    | 402    | 39.45 | 74.15 |
| CA.58                | IgG | 4254    | 163    | 3179   | 95.12 | 96.17 |
| CA.59                | IgA | 125125  | 15812  | 44696  | 73.87 | 87.36 |
| CA.59                | IgG | 136475  | 6532   | 54707  | 89.33 | 95.21 |
| CA.60                | IgA | 119635  | 44510  | 26248  | 37.10 | 62.80 |
| CA.60                | IgG | 96302   | 22438  | 25723  | 53.41 | 76.70 |
| CA.61                | IgA | 42324   | 15679  | 5141   | 24.69 | 62.95 |
| CA.61                | IgG | 93251   | 9776   | 37207  | 79.19 | 89.52 |
|                      |     |         |        |        |       |       |
| <i>Breast milk</i>   |     |         |        |        |       |       |
| Sample 1             | IgA | 379082  | 70943  | 56319  | 44.25 | 81.29 |
| Sample 1             | IgG | 554106  | 59580  | 21512  | 26.53 | 89.25 |
| Sample 2             | IgA | 596418  | 115046 | 50852  | 30.65 | 80.71 |
| Sample 2             | IgG | 641861  | 65202  | 2424   | 3.58  | 89.84 |
| Sample 3             | IgA | 219940  | 105690 | 85690  | 44.77 | 51.95 |
| Sample 3             | IgG | 229950  | 100236 | 12563  | 11.14 | 56.41 |
| Sample 4             | IgA | 118347  | 30491  | 53294  | 63.61 | 74.24 |
| Sample 4             | IgG | 40248   | 9176   | 9853   | 51.78 | 77.20 |
| Sample 5             | IgA | 87003   | 39300  | 45063  | 53.42 | 54.83 |
| Sample 5             | IgG | 57503   | 34097  | 2657   | 7.23  | 40.70 |
| Sample 6             | IgA | 75132   | 46264  | 5964   | 11.42 | 38.42 |
| Sample 6             | IgG | 72164   | 44279  | 1212   | 2.66  | 38.64 |
| Sample 7             | IgA | 846301  | 274013 | 35373  | 11.43 | 67.62 |
| Sample 7             | IgG | 988582  | 485195 | 15098  | 3.02  | 50.92 |
| Sample 8             | IgA | 27776   | 10903  | 15418  | 58.58 | 60.75 |
| Sample 8             | IgG | 44849   | 13534  | 1000   | 6.88  | 69.82 |
| Sample 9             | IgA | 69826   | 50126  | 1930   | 3.71  | 28.21 |
| Sample 9             | IgG | 72476   | 38785  | 25250  | 39.43 | 46.49 |
| Sample 10            | IgA | 96112   | 28192  | 49888  | 63.89 | 70.67 |
| Sample 10            | IgG | 92235   | 20951  | 4014   | 16.08 | 77.29 |
| Sample 11            | IgA | 150886  | 41487  | 93945  | 69.37 | 72.50 |
| Sample 11            | IgG | 145377  | 60451  | 3190   | 5.01  | 58.42 |
| Sample 12            | IgA | 525752  | 256581 | 35622  | 12.19 | 51.20 |
| Sample 12            | IgG | 513255  | 312540 | 6512   | 2.04  | 39.11 |
|                      |     |         |        |        |       |       |
| <i>Fecal samples</i> |     |         |        |        |       |       |
| 1                    | IgA | 647170  | 580473 | 64717  | 10.03 | 10.31 |
| 2                    | IgA | 638335  | 124016 | 510668 | 80.46 | 80.57 |
| 3                    | IgA | 668882  | 12976  | 655504 | 98.06 | 98.06 |
| 4                    | IgA | 653784  | 470780 | 137295 | 22.58 | 27.99 |
| 5                    | IgA | 431783  | 291352 | 138171 | 32.17 | 32.52 |
| 6                    | IgA | 287278  | 102468 | 163748 | 61.51 | 64.33 |
